# Supplementary material for: The role of computational methods in cardiovascular medicine: a narrative review
Source: PubMed Central journal article supplement — Transl Pediatr. 2024 Jan 24;13(1):146–63. doi: 10.21037/tp-23-184 (PMC10839285; doi:10.21037/tp-23-184), 2024-01-24
Supplement: tp-13-01-146-rc.pdf [file tp-13-01-146-rc.pdf]

## Narrative Review Checklist

| Section/Topic             | Item No | Item                                                                                                                                                                               | Reported on Page Number/Line Number | Reported on Section/Paragraph |
|---------------------------|---------|------------------------------------------------------------------------------------------------------------------------------------------------------------------------------------|-------------------------------------|-------------------------------|
| <b>TITLE</b>              |         |                                                                                                                                                                                    |                                     |                               |
| Title                     | 1       | Identify the report as a Narrative Review or Literature Review.                                                                                                                    |                                     |                               |
| <b>ABSTRACT</b>           |         |                                                                                                                                                                                    |                                     |                               |
| Structured summary        | 2       | Provide a structured summary with the subsections as: Background and Objective, Methods, Key Content and Findings, Conclusions.                                                    |                                     |                               |
| <b>INTRODUCTION</b>       |         |                                                                                                                                                                                    |                                     |                               |
| Rationale/background      | 3       | Describe the rationale for the review in the context of what is already known.                                                                                                     |                                     |                               |
| Objectives                | 4       | Specify the key question(s) identified for the review topic.                                                                                                                       |                                     |                               |
| <b>METHODS</b>            |         |                                                                                                                                                                                    |                                     |                               |
| Research selection        | 5       | Specify the process for identifying the literature search (eg, years considered, language, publication status, study design, and databases of coverage).                           |                                     |                               |
| <b>DISCUSSION/SUMMARY</b> |         |                                                                                                                                                                                    |                                     |                               |
| Narrative                 | 6       | Discuss: 1) research reviewed including fundamental or key findings, 2) limitations and/or quality of research reviewed, and 3) need for future research.                          |                                     |                               |
| Summary                   | 7       | Provide an overall interpretation of the narrative review in the context of clinical practice for health professionals, policy development and implementation, or future research. |                                     |                               |
